# Supplementary material
Source: publisher figshare collection journal article supplement (https://gsajournals.figshare.com/ndownloader/files/28864887)
Supplement: Supplementary file 1 [file 28864887]

## Sheet: Table S2.1
Table S2.1: Results of the Oxford Nanopore long read sequencing run
ONT MinION run: 22 August 2018  Sample: FG1804_10  DNA was sheared using gTUBE  Library/run mode was Ligation Sequencing Kit - SQK-LSK109  Basecalling was done using Guppy v2.2.2 (7 January 2019)
DNA sample	Run Date	Flowcell ID	total # reads	total # data (Gb)		mean read (nt)		read N50 (nt)
FG1804_10	2018-08-22	FAH80770	973209	7.4		7626		13164
ONT PromethION run: 5 September 2018
 Sample: FG1804_10  DNA was sheared using gTUBE  Library/run mode was Ligation Sequencing Kit - SQK-LSK109  Basecalling was done using Guppy v1.6.0
DNA sample	Run Date	Flowcell ID	total # reads		total # data (Gb)		mean read (nt)		read N50 (nt)	Longest read (nt)
FG1804_10	2018-09-05	PAC22206	14580673		92.3		6328		12191	544873

## Sheet: Table S2.2
Table S2.2: Results of the Illumina short read sequencing run
Illumina NovaSeq6000 run: 8 November 2018
Sample #	Sample code	FASTQ file	# clusters	Date
FG1804_10	10	FG1804_37240_AAGAGGCATATCCTCT_L001_R1_001.fastq FG1804_37240_AAGAGGCATATCCTCT_L001_R2_001.fastq	242,312,232 (73.2 Gb)	8 Nov 2018

## Sheet: Table S2.3
Table S2.3: Results of the trimming and cleaning steps.
 All nanopore reads from MinION flowcell FAH80770 and PromethION flowcell PAC22206 were combined and filtered based on quality value (qv) = 7
DNA sample	Flowcell ID	total # qv7 reads		total # qv7 data (Gb)		mean qv7 read (nt)		qv7 read N50 (nt)		longest qv7 read (nt)
FG1804_10	FAH80770 PAC22206	9650661		72.9		7548		12805		156345
 35x coverage of the estimated genome size (~400 Mb) was selected for final de novo assembly of the genome sequence
DNA sample	Flowcell ID	selected qv7 reads	selected qv7 data (Gb)		mean qv7 selected reads (nt)		N50 qv7 selected reads (nt)		longest qv7 selected read (nt)
FG1804_10	FAH80770 PAC22206	500001	13		26054		25232		156345
